# Supplementary material for: Eliminating fine-grained layers in Cu(In,Ga)(S,Se)2 thin films for solution-processed high efficiency solar cells
Source: Royal Society of Chemistry journal article supplement (doi:10.1039/c6ta05728d), 2016-01-01
Supplement: c6ta05728d1.pdf [file c6ta05728d1.pdf]

## Electronic Supplementary Information

### Eliminating Fine-Grained Layer in $\text{Cu}(\text{In,Ga})(\text{S,Se})_2$ Thin Films for Solution-Processed High Efficient Solar Cells†

Dandan Zhao,<sup>†ab</sup> Qingmiao Fan,<sup>†ab</sup> Qingwen Tian,<sup>\*ab</sup> Zhengji Zhou,<sup>ab</sup> Yuena Meng,<sup>ab</sup> Dongxing Kou,<sup>ab</sup> Wenhui Zhou,<sup>ab</sup> and Sixin Wu<sup>\*ab</sup>

Dandan Zhao and Qingmiao Fan contributed equally to this work.

<sup>a</sup>The Key Laboratory for Special Functional Materials of MOE, Henan University, Kaifeng, 475004, China.  
E-mail: tianqw@henu.edu.cn; wusixin@henu.edu.cn.

<sup>b</sup>Collaborative Innovation Center of Nano Functional Materials and Applications, Henan University, Kaifeng 475004, Henan, China

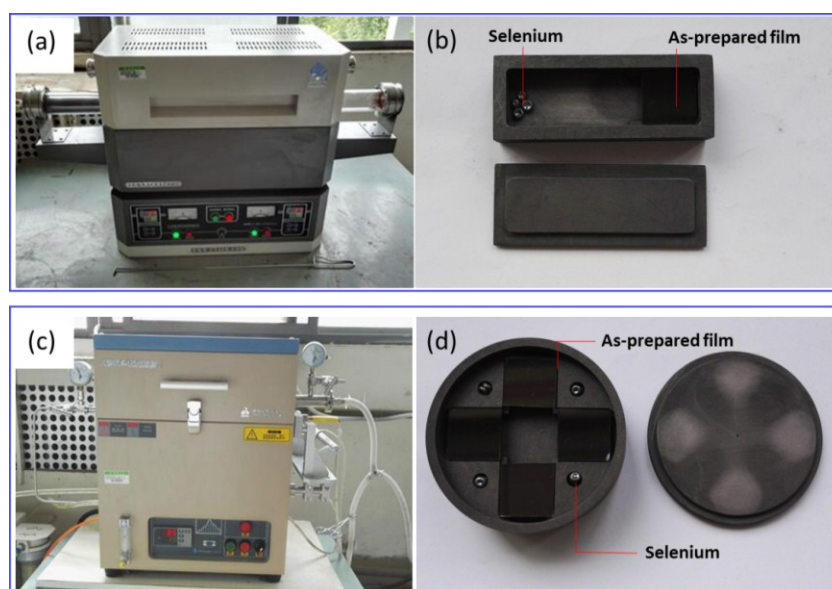

**Fig. S1** The digital photographs of (a) tubular furnace, (b) rectangle graphite box, (c) RTP furnace, and (d) round graphite box.

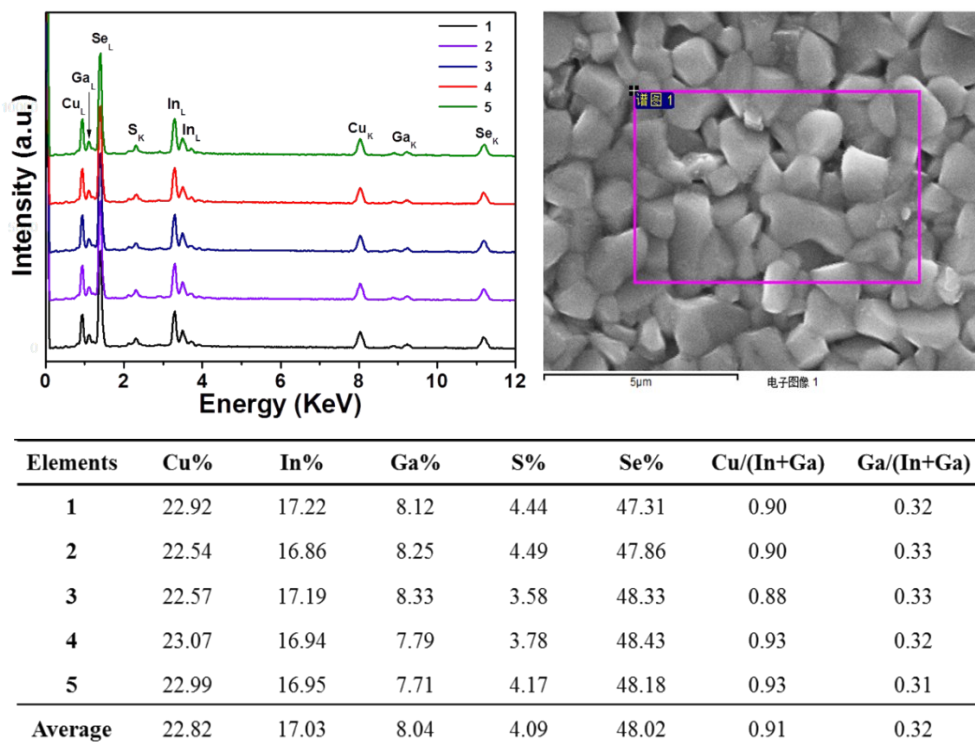

Fig. S2 EDS spectra, and chemical compositions of the selenized CIGSSe thin film.

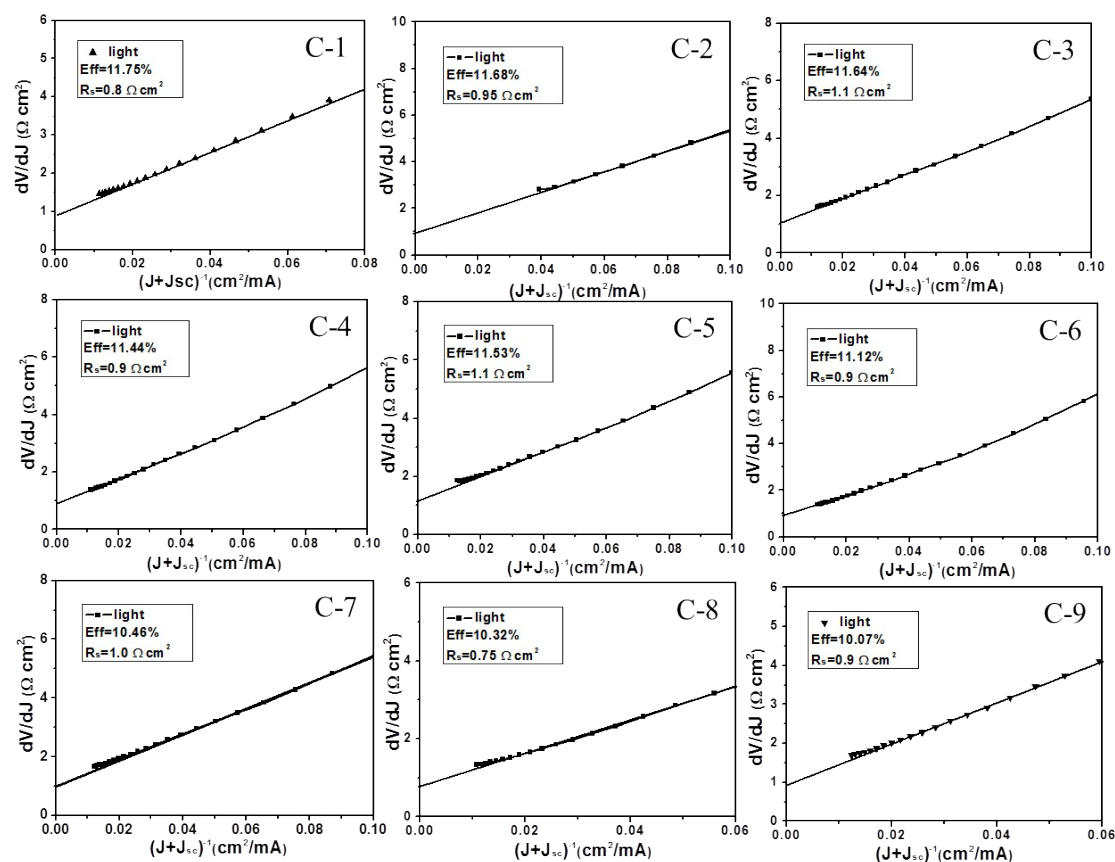

Fig. S3 Plots of  $dV/dJ$  vs  $(J+J_{sc})^{-1}$  redrawn from the standard light  $J$ - $V$  curves of nine CIGSSe solar cells on the same substrate (C-1~ C-9).

**Table S1** Devices parameters of the solar cells in our previous work and the present work.<sup>1</sup>

| Solar cells | Efficiency | $V_{OC}$ | $J_{SC}$              | FF    | $R_s$                        | $R_{sh}$                     |
|-------------|------------|----------|-----------------------|-------|------------------------------|------------------------------|
|             | [%]        | [mV]     | [mA/cm <sup>2</sup> ] | [%]   | [ $\Omega$ cm <sup>2</sup> ] | [ $\Omega$ cm <sup>2</sup> ] |
| S-1         | 9.50       | 528      | 26.64                 | 67.48 | 1.50                         | 1565                         |
| C-1         | 11.75      | 596      | 28.25                 | 69.80 | 0.80                         | 2011                         |

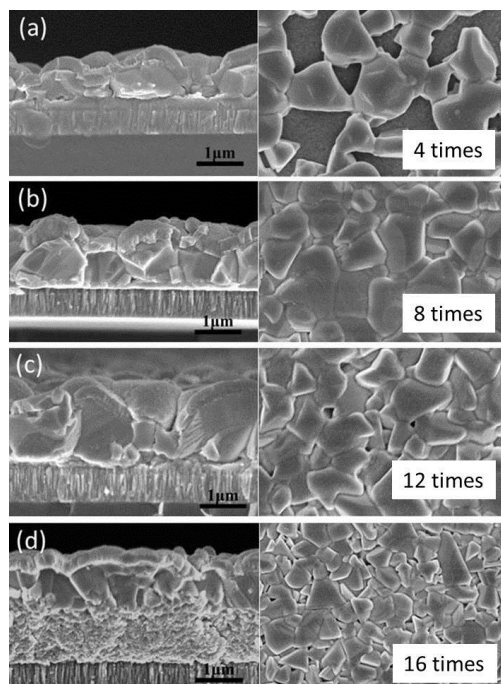

**Fig. S4** Cross-sectional SEM images of the CIGSs solar cells (the left) and top-view SEM images of the CIGSs films (the right) with different spin-coating/sintering cycles.

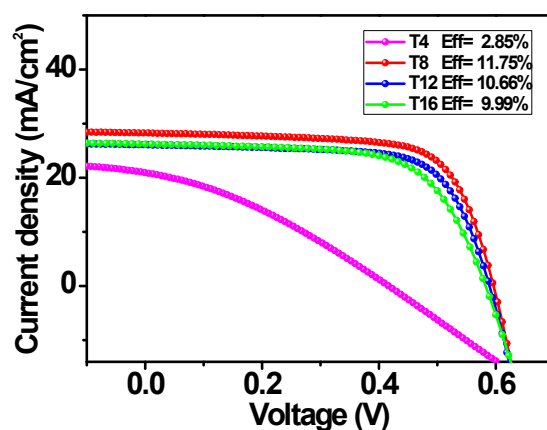

**Fig. S5** Typical *J-V* curves of the CIGSs solar cells with different spin-coating/sintering cycles under one sun AM 1.5G condition

#### References:

1. D. Zhao, Q. Tian, Z. Zhou, G. Wang, Y. Meng, D. Kou, W. Zhou, D. Pan and S. Wu, *J. Mater. Chem. A*, 2015, **3**, 19263.
